# Supplementary material
Source: publisher figshare collection journal article supplement (https://acs.figshare.com/ndownloader/files/4343680)

## Supporting Information

**Figure S1.** DTA curve of  $\text{Li}(\text{H}_2\text{O})_{2-x}[\text{Zr}_2(\text{PO}_4)_3]$  ( $x = 0$ ) at low temperature from  $-170\text{ }^\circ\text{C}$  to  $25\text{ }^\circ\text{C}$  and back to  $-170\text{ }^\circ\text{C}$ .

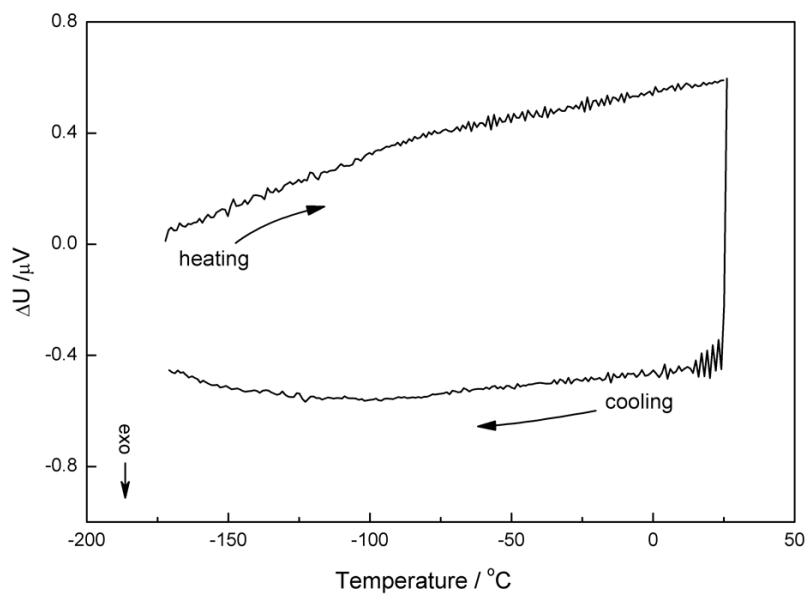

**Figure S2.** DTA curves of anhydrous cubic  $\text{Li}(\text{H}_2\text{O})_{2-x}[\text{Zr}_2(\text{PO}_4)_3]$  ( $x = 2$ ) from  $-180\text{ }^\circ\text{C}$  to  $600\text{ }^\circ\text{C}$  and back to  $-180\text{ }^\circ\text{C}$ .

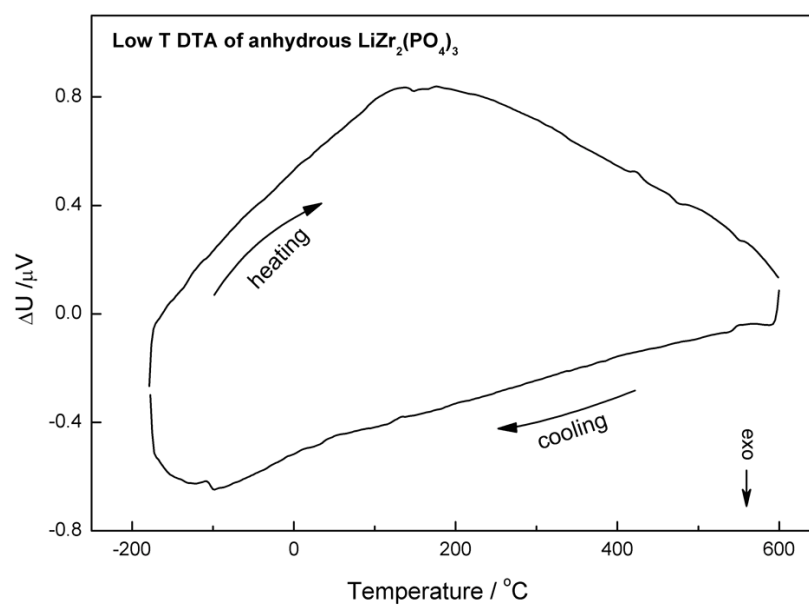

**Figure S3.** DTA curves of  $\alpha'$ -LiZr<sub>2</sub>(PO<sub>4</sub>)<sub>3</sub> from -180 °C to 600 °C and back to -180 °C (insert: DTA curve of  $\alpha'$ -LiZr<sub>2</sub>(PO<sub>4</sub>)<sub>3</sub> at high temperature up to 1200 °C).

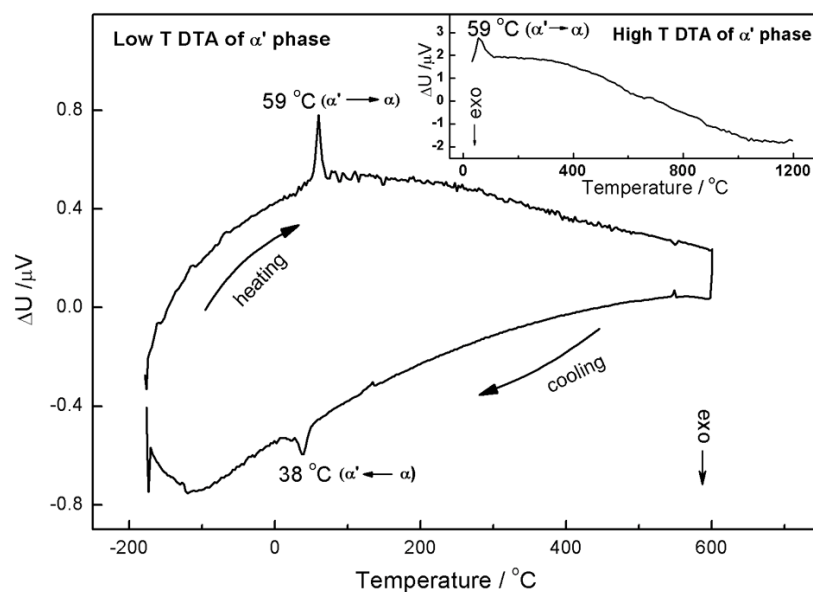

**Figure S4.** DTA curves of  $\beta'$ -LiZr<sub>2</sub>(PO<sub>4</sub>)<sub>3</sub> from -180 °C to 600 °C and back to -180 °C.

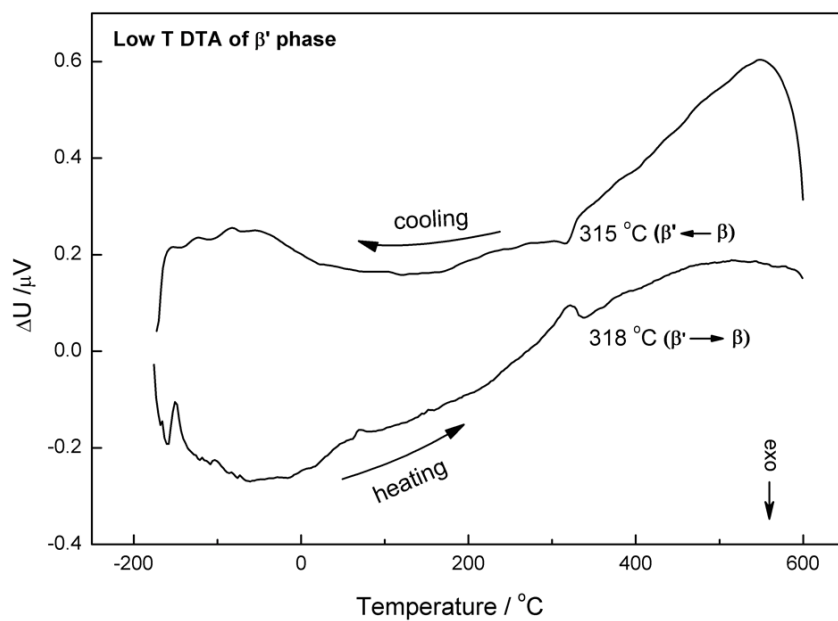

Supplement: Supplementary file 1 [file 4343680]
